# Supplementary material for: Poly(ε-caprolactone)-poly(ethylene glycol) Tri-Block Copolymer as Quercetin Delivery System for Human Colorectal Carcinoma Cells: Synthesis, Characterization and In Vitro Study
Source: MDPI journal article supplement (doi:10.3390/polym15051179), 2023-02-26
Supplement: s1 [file s1]

## SUPPORTING INFORMATION

### Table of contents

|                                                                                                                                                       |   |
|-------------------------------------------------------------------------------------------------------------------------------------------------------|---|
| <b>Figure S1.</b> $^1\text{H}$ NMR spectrum (300 MHz, $\text{CDCl}_3$ , 298 K) of PEG diol.....                                                       | 2 |
| <b>Figure S2.</b> GPC curve of triblock PCL-PEG-PCL copolymer.....                                                                                    | 2 |
| <b>Figure S3.</b> GPC curve of PEG diol.....                                                                                                          | 3 |
| <b>Figure S4.</b> FT-IR spectrum of triblock PCL-PEG-PCL copolymer.....                                                                               | 3 |
| <b>Figure S5.</b> DOSY NMR spectrum (400 MHz, $\text{CDCl}_3$ , 298 K) of PCL.....                                                                    | 4 |
| <b>Figure S6.</b> $^1\text{H}$ NMR spectrum (400 MHz, DMSO, 298 K) of triblock PCL-PEG-PCL copolymer.....                                             | 4 |
| <b>Figure S7.</b> $^1\text{H}$ NMR spectrum (300 MHz, DMSO, 298 K) of PCL-PEG-PCL micelles loaded with Nile Red.....                                  | 5 |
| <b>Figure S8.</b> $^1\text{H}$ NMR spectrum (400 MHz, DMSO, 298 K) of PCL-PEG-PCL micelles loaded with quercetin.....                                 | 6 |
| <b>Figure S9.</b> DLS measurement of aqueous solution in the absence of quercetin loaded nanoparticles.....                                           | 6 |
| <b>Figure S10.</b> $^1\text{H}$ NMR spectrum (400 MHz, DMSO, 298 K) of (a) unloaded polymer, (b) quercetin and (c) polymer loaded with quercetin..... | 7 |
| <b>Figure S11.</b> Isobologram analysis of the effects of NP+Q combination at different concentrations.....                                           | 7 |

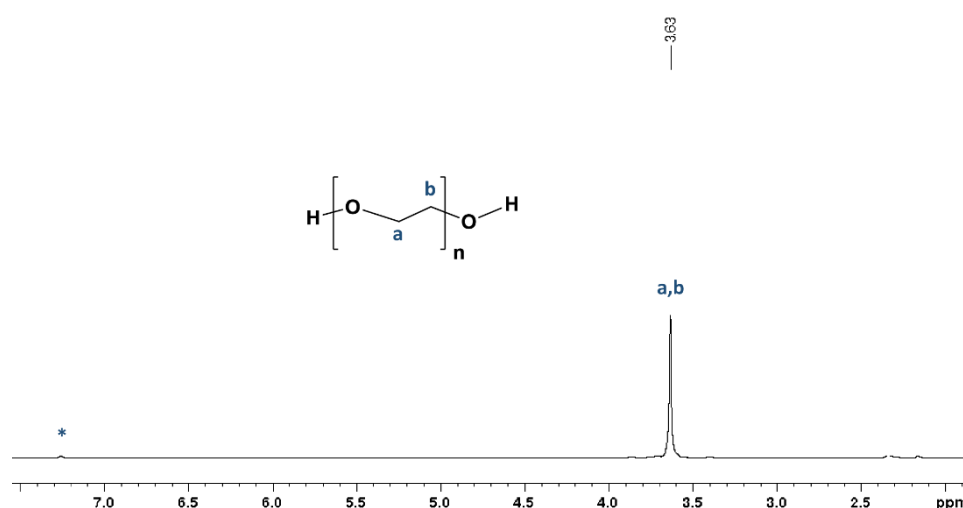

**Figure S1.**  $^1\text{H}$  NMR spectrum (300 MHz,  $\text{CDCl}_3$ , 298 K) of PEG diol.

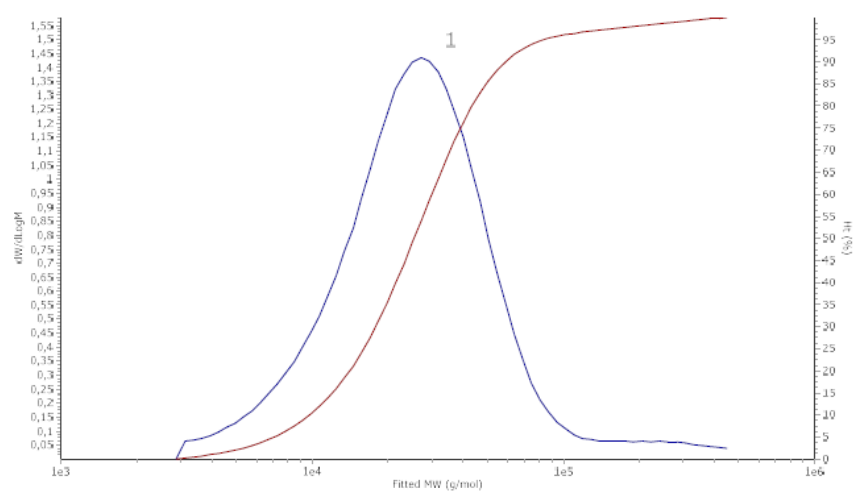

**Figure S2.** GPC curve of triblock PCL-PEG-PCL copolymer.

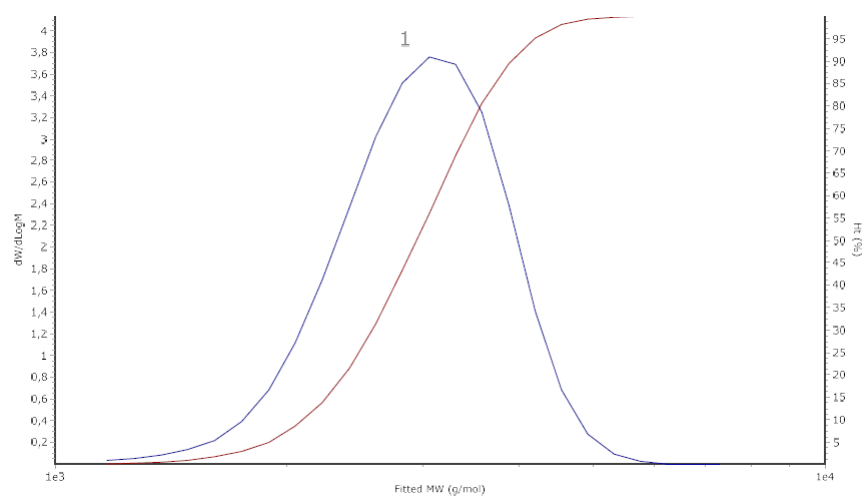

**Figure S3.** GPC curve of PEG diol. GPC analysis (THF):  $M_n$ : 2870 g/mol;  $\bar{D} = 1.1$ .

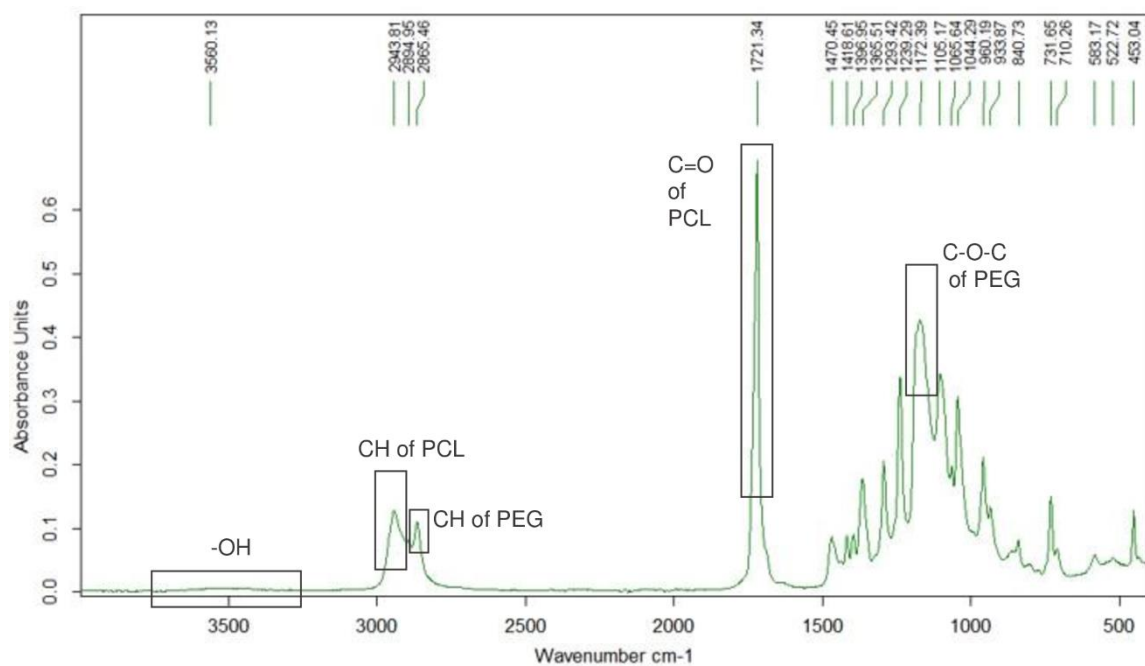

**Figure S4.** FT-IR spectrum of triblock PCL-PEG-PCL copolymer.

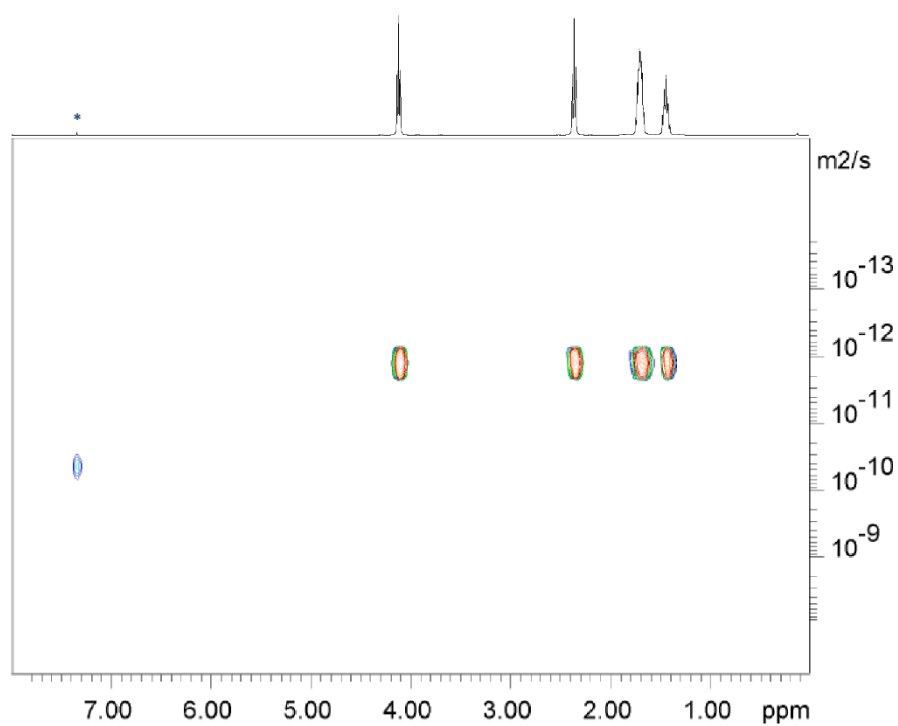

**Figure S5.** DOSY NMR spectrum (400 MHz,  $\text{CDCl}_3$ , 298 K) of PCL.

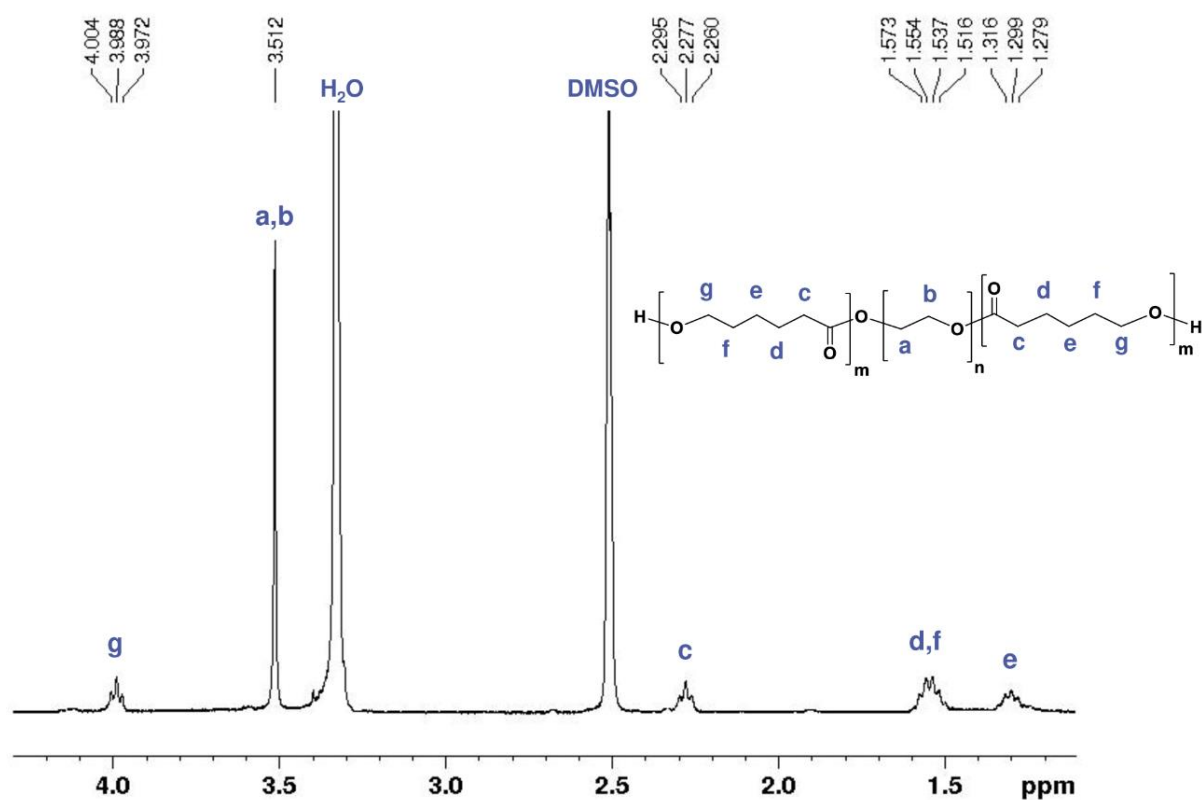

**Figure S6.**  $^1\text{H}$  NMR spectrum (400 MHz, DMSO, 298 K) of triblock PCL-PEG-PCL copolymer.

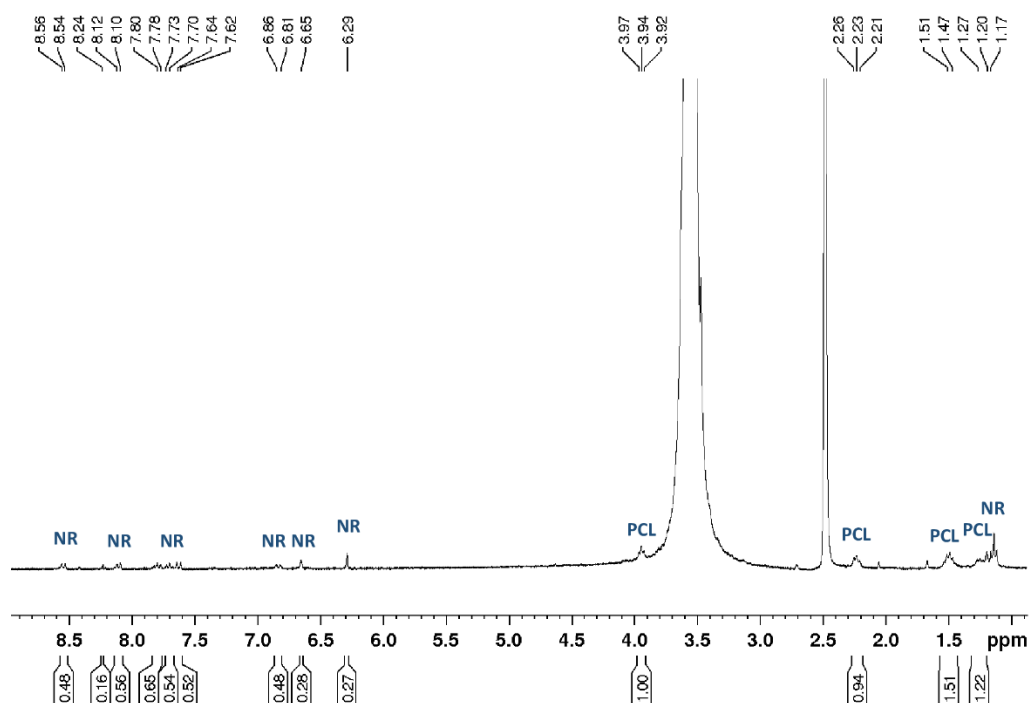

**Figure S7.**  $^1\text{H}$  NMR spectrum (300 MHz, DMSO, 298 K) of PCL-PEG-PCL micelles loaded with Nile Red.

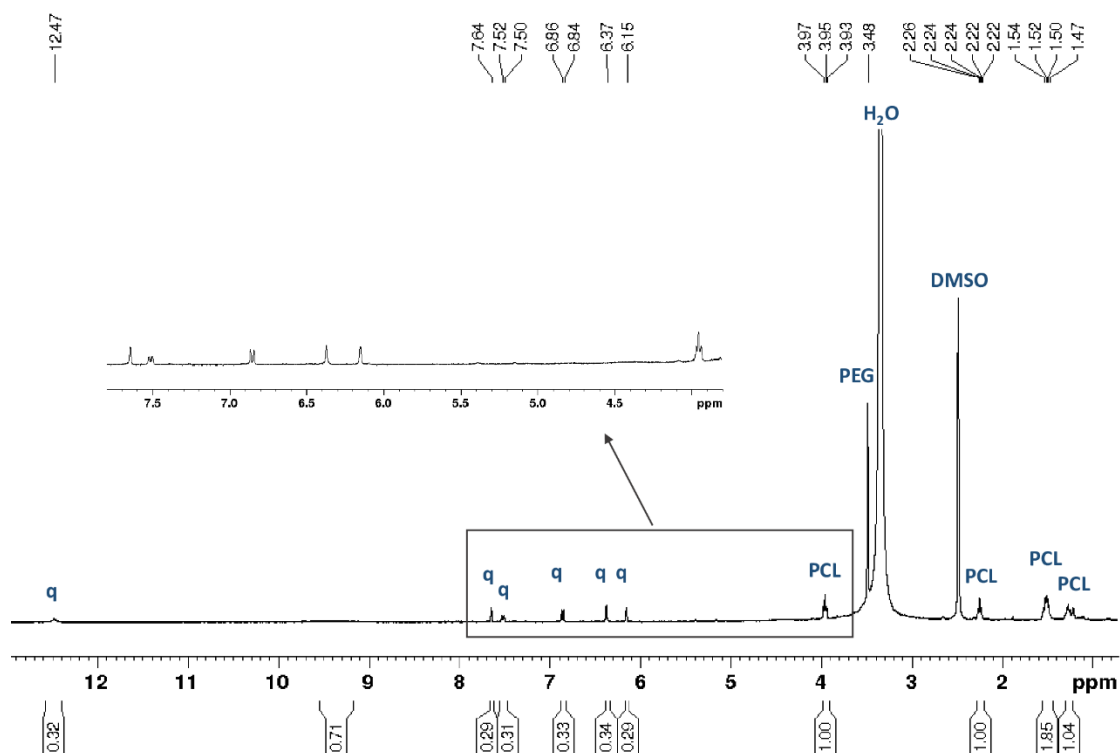

**Figure S8.**  $^1\text{H}$  NMR spectrum (400 MHz, DMSO, 298 K) of PCL-PEG-PCL micelles loaded with quercetin.

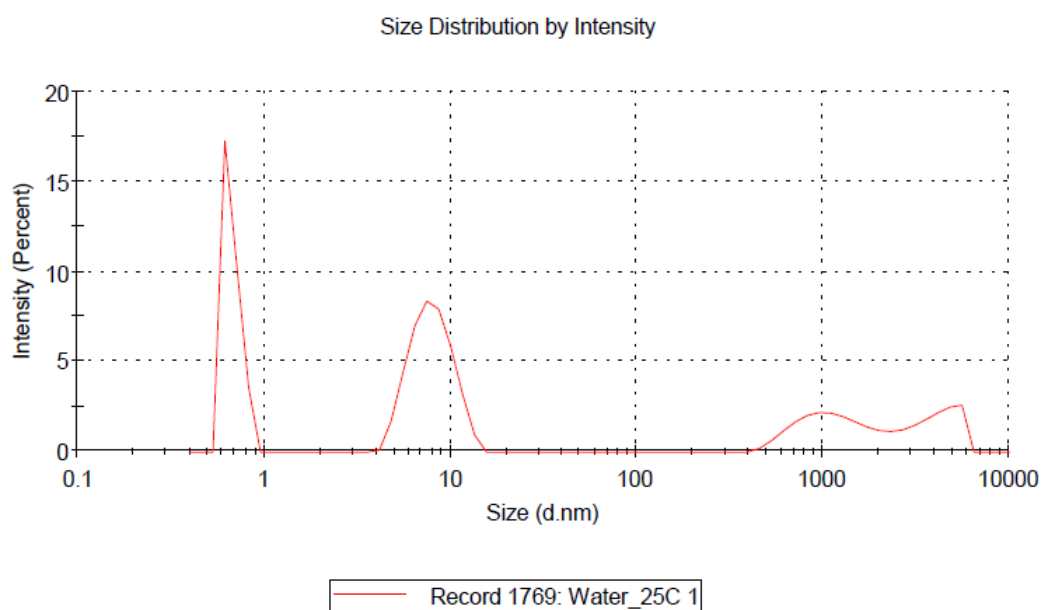

**Figure S9.** DLS measurement of aqueous solution in the absence of quercetin loaded nanoparticles.

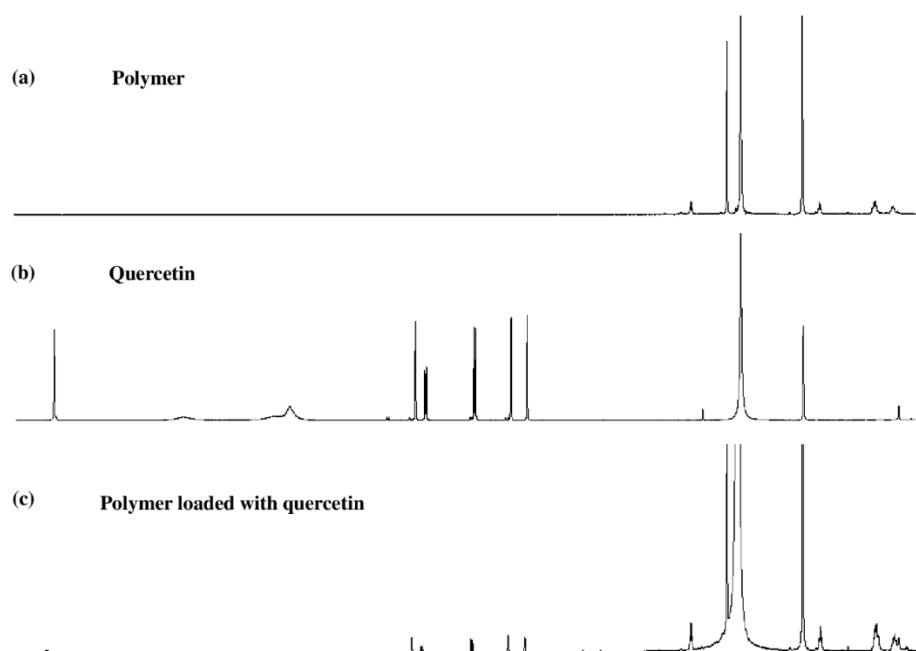

**Figure S10.**  $^1\text{H}$  NMR spectrum (400 MHz, DMSO, 298 K) of (a) unloaded polymer, (b) quercetin and (c) polymer loaded with quercetin.

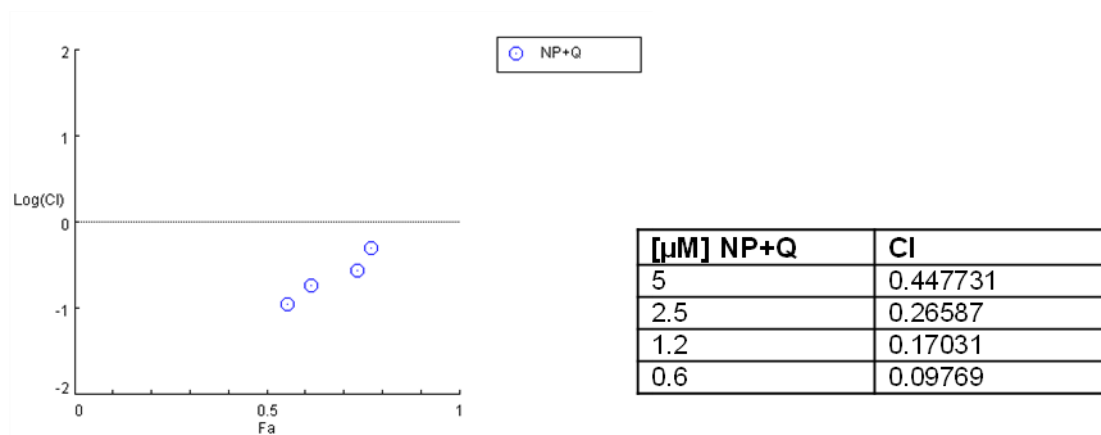

**Figure S11.** Isobologram analysis of the effects of NP+Q combination at different concentrations.

Combination index between NPs and quercetin by the dedicated software Compusyn as described in Material and methods.
